1  
2  
3  
4  
5  
6  
7  
8  
9  
10  
11  
12  
13  
14  
15  
16  
17  
18  
19

Whole genome analysis reveals pathogenic potential of multi-drug resistant wastewater

*Escherichia coli*

Norhan Mahfouz<sup>1,\*</sup>, Serena Caucci<sup>2,3,\*</sup>, Eric Achatz<sup>1</sup>, Torsten Semmler<sup>4</sup>, Sebastian Guenther<sup>4</sup>,  
Thomas U. Berendonk<sup>2,\*</sup>, and Michael Schroeder<sup>1,\*,#</sup>

<sup>1</sup> Biotec, TU Dresden

<sup>2</sup> Institute for Hydrobiology, TU Dresden

<sup>3</sup> United Nations University Institute for Integrated Management of Material Fluxes and of  
Resources

<sup>4</sup> Institute of Microbiology und Epizootics, FU Berlin

\* These authors contributed equally

# Correspondence: Michael Schroeder, [ms@biotec.tu-dresden.de](mailto:ms@biotec.tu-dresden.de)

Keywords: Antibiotic Resistance, Wastewater Treatment, Pan-Core genome, Environment

Conflict of interest statement: The authors declare no conflict of interest.

20

21 **Abstract**

22 Wastewater treatment plants play an important role in antibiotic resistance development. While it  
23 has been shown that wastewater effluents contain resistant bacteria, resistance genes, and  
24 antibiotics, there is little knowledge on the link between resistance genotype and phenotype.  
25 Here we present the first study, which combines a culture-based phenotypic screen with the  
26 analysis of whole genome sequences for the indicator species *Escherichia coli* of the inflow and  
27 outflow of a sewage treatment plant. Our analysis reveals that nearly all isolates are multi-drug  
28 resistant and many are potentially pathogenic. This holds in particular for the outflow of the  
29 treatment plant. We devise a computational approach correlating genotypic variation and  
30 resistance phenotype, which identifies known and candidate resistance genes. The identified  
31 genes stem from the pan genome, which is large and thus reflects the genomic heterogeneity of a  
32 treatment plant. Overall, the screen and analysis show that sewage treatment plants provide a  
33 favourable environment for antibiotic resistance development and that resistant bacteria do not  
34 appear to suffer from a competitive disadvantage in wastewater. These findings should find  
35 consideration in future improvements of wastewater treatment.

36

37

38

39

## 40 **Introduction**

41 In 1945, Alexander Fleming, the discoverer of Penicillin, warned of antibiotic resistance. Today,  
42 the WHO echoes this warning, calling antibiotic resistance a global threat to human health.

43 Humans are at the center of the modern rise of resistance. The human gut (1), clinical samples  
44 (2, 3), soil (4, 5), and wastewater (6) all harbor resistant bacteria and resistance genes. At the  
45 heart of modern resistance development is a human-centered network of clinics, industry, private  
46 homes, farming, and wastewater. However, it is unclear, where antibiotic resistance emerges and  
47 in particular, there are contradictory views on the role of wastewater treatment plants (6). On the  
48 one hand, the harsh environment of a treatment plant appears unfavourable for resistant bacteria  
49 (7), but on the other hand, it forms a very rich genetic reservoir, where highly diverse bacteria  
50 mingle (6). Also, it is unclear, whether or not any bacteria with pathogenic potential emerge after  
51 treatment.

52 To address these questions, we collected 1178 *Escherichia coli* isolates from a waste treatment  
53 plant's inflow and outflow in the city of Dresden, Germany. We selected 20 antibiotics, which are  
54 the most prescribed ones in the area from which the wastewater inflow originates (data provided  
55 by the public health insurer AOK). We analyzed the isolates' resistance to these 20 antibiotics  
56 and selected 103 isolates for whole genome sequencing. Our analysis reveals that wastewater  
57 outflow harbors multi-drug resistant *Escherichia coli* with pathogenic potential and very flexible  
58 genomes harboring resistance genes.

59

60

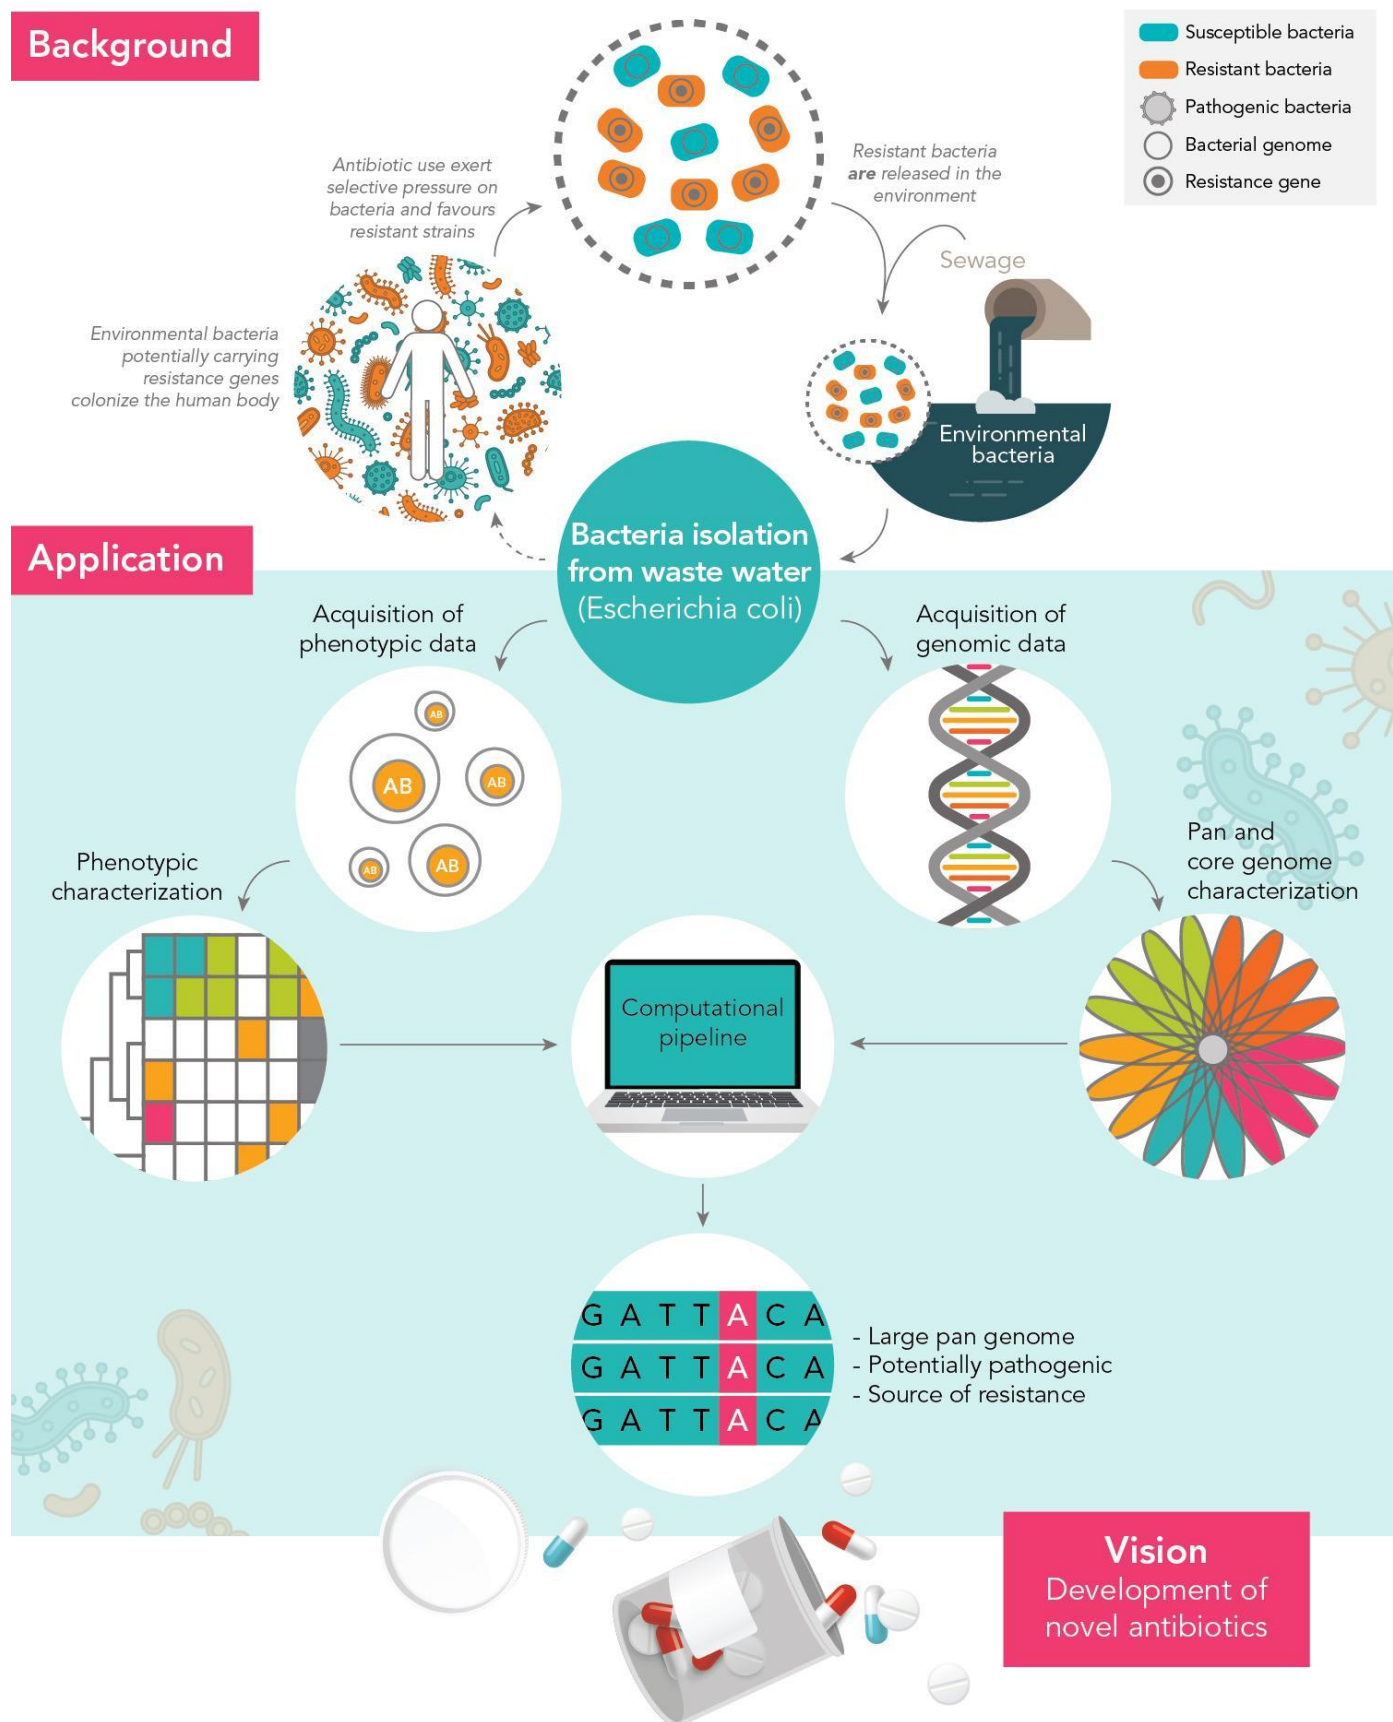

61

62 Figure 1: Wastewater plays an important role in antibiotic resistance development. Wastewater *E.*  
 63 *coli* isolates are tested for antibiotic resistance and sequenced. Many isolates are multi-drug  
 64 resistant and potentially pathogenic. Their large pan-genome is a source of potentially novel  
 65 resistance genes.

66

67

## 68 **Results**

69 **Pathogenic potential.** *Escherichia coli* strains exhibit great variation. Many exist as harmless  
70 commensals in the human gut, but some are intra- (InPEC) or extra-intestinal pathogenic  
71 *Escherichia coli* (ExPEC). To assess the pathogenic potential without in vivo testing, clinical  
72 research has developed databases of virulence factors and genotyping schemes. The sequenced  
73 isolates contain some 700 of the 2000 *Escherichia coli* virulence factors in the virulence factor  
74 database (8), averaging to 153 and to 155 virulence factors per isolate for inflow and outflow,  
75 respectively. Hence, there is no significant difference (Welch test, CI 95%) between inflow and  
76 outflow. In particular, we found combinations of virulence factors for 16 isolates (see methods),  
77 which are indicative of ExPEC. Eight of these 16 isolates were obtained from the outflow of the  
78 treatment plant (see Fig. 2).

79

80 Besides the presence of known virulence factors, the pathogenic potential can be assessed using  
81 genotyping with multi-locus sequence types (9) and phylogroups (10). Broadly, *Escherichia coli*  
82 has, among others, four phylogroups, A, B1, B2 and D. Commensal *Escherichia coli* fall mostly  
83 into groups A and B1 and ExPEC into B2 and D (10). Fig. 2 shows a phylogenetic tree of the  
84 sequenced wastewater *Escherichia coli* isolates along with the commensal phylogroups A (red)  
85 and B1 (blue) and the pathogenicity-associated groups B2 (yellow) and D (green), as well as the  
86 finer-grained multi-locus sequence types. The tree is based on genomic variations compared to  
87 the reference genome of *Escherichia coli* K12 MG1655. Fig. 2 reveals that nearly one third of  
88 isolates belong to group B2 and D, in which ExPEC are usually found. In particular, B2 and D  
89 include 14 of the 16 potential ExPEC isolates. Remarkably, half of the B2 and D isolates are from  
90 the wastewater treatment plant's outflow.

91

92

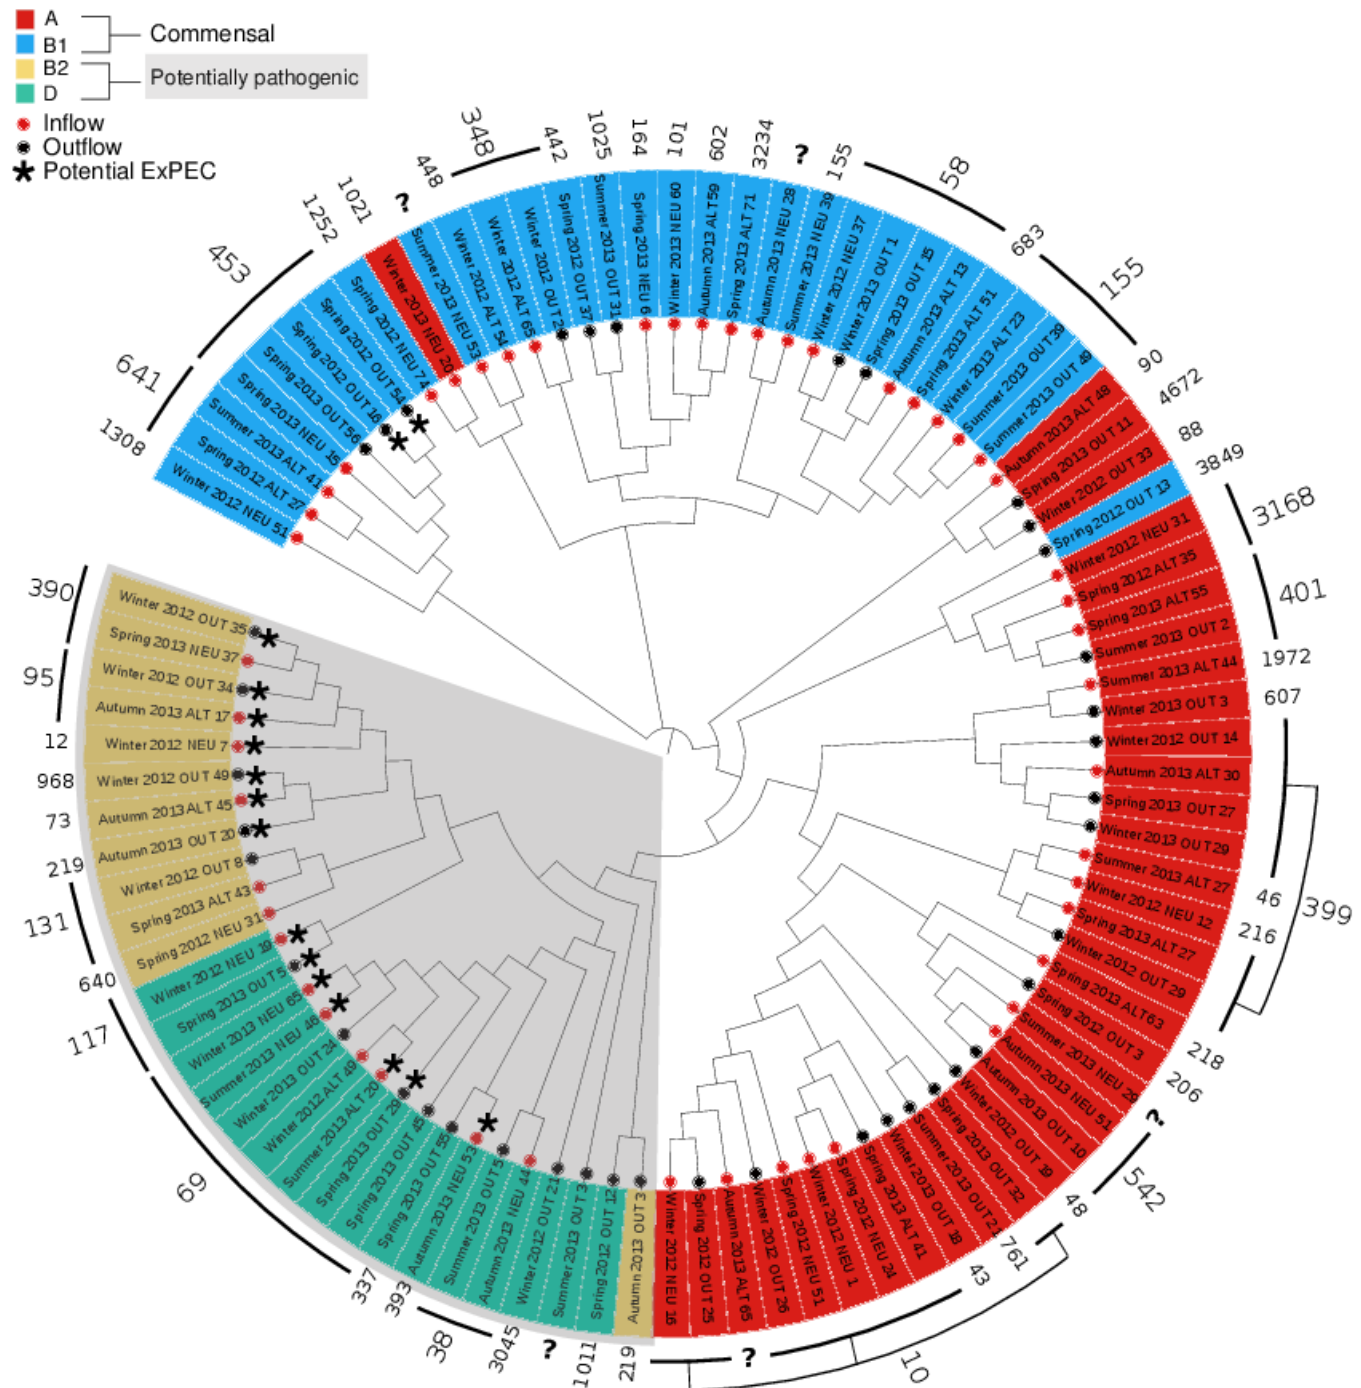

93

94 Figure 2: Phylogeny and pathogenic potential of wastewater *Escherichia coli*. Phylogenetic tree,  
 95 multi-locus sequence types, and phylogroups of 92 sequenced wastewater *Escherichia coli*  
 96 isolates reveal 16 potential ExPEC isolates (marked with a black star) in phylogroups B2 (yellow)  
 97 and D (green), which are associated with pathogenicity. Half of the potentially pathogenic isolates  
 98 stem from the outflow of the treatment plant.

99

100  
101 **The wastewater pan-genome.** The concept of evolution implies that genomes of organisms of  
102 the same species differ. Differences range from small single nucleotide polymorphisms to large  
103 genome rearrangements. As a consequence, *Escherichia coli* possesses a core of genes present  
104 in all genomes, as well as genes only present in some genomes, or even just in one. The union of  
105 all of these genes is called the pan-genome. It is believed, that the *Escherichia coli* core genome  
106 comprises around 1400-1500 genes, while the pan-genome may be of infinite size (11).

107  
108 To assess the degree of genomic flexibility of the wastewater isolates, we relate the wastewater  
109 pan-genome and the wastewater core genome. At 16582 genes, the wastewater pan-genome is  
110 nearly six times larger than the wastewater core genome of 2783 genes, a reservoir of some  
111 14000 genes. Despite this large reservoir, the size difference of nearly 1000 genes between the  
112 wastewater *Escherichia coli* core genome and the whole species core genome suggests that the  
113 full diversity of *Escherichia coli* is still not covered in our wastewater sample.

114  
115 The balance between maintaining the core genome and spending energy on acquisition of new  
116 genetic material can be captured by the ratio of the core genome size and the average genome  
117 size, which is 4700 genes in our sample. This means that only  $1400/4700 = 30\%$  of genes in our  
118 wastewater *Escherichia coli* are core genes. Most of the non-core genes are very unique and  
119 appear only in one or two isolates each. More precisely, 50% of the pan-genome genes appear in  
120 only one or two isolates each. This implies that the wastewater *Escherichia coli* studied are highly  
121 individual.

122  
123 But do *Escherichia coli* maintain such a rich genome after wastewater treatment? Fig. 3 shows  
124 that they do. The 42 *Escherichia coli* genomes of the plant's outflow comprise nearly 12000  
125 genes and the pan-genome growth curves between in- and outflow are nearly identical, which  
126 means that wastewater treatment does not affect the genetic diversity of *Escherichia coli*. Fig. 3  
127 also shows a clinical dataset of ExPEC and these clinical *Escherichia coli* are more  
128 homogeneous and hence their pan-genome is smaller. In contrast, the diversity of the wastewater  
129 *Escherichia coli* match other datasets comprising mixtures of commensal and pathogenic

130 *Escherichia coli*, as well as *Shigella* genomes (see Table 1). This underlines the great diversity of  
 131 genomes before and after wastewater treatment and leads to the question whether these diverse  
 132 genomes harbour antibiotic resistance genes?

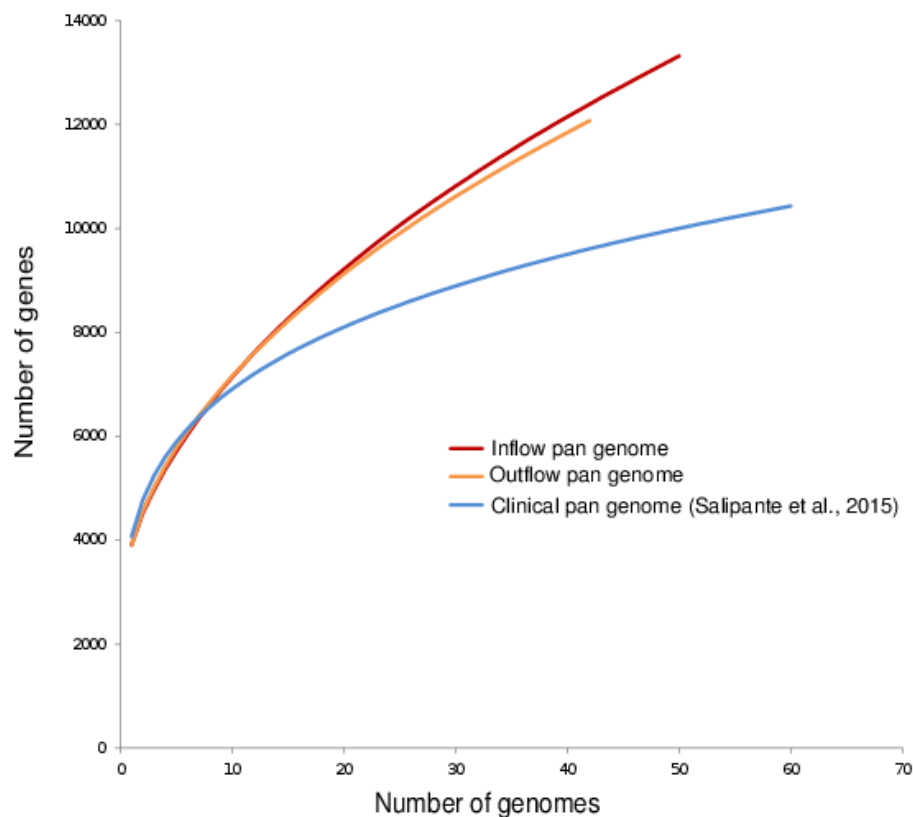

133  
 134 Figure 3: The pan-genome at the outflow has the same size as at the inflow, suggesting that  
 135 highly flexible *Escherichia coli* emerge from a treatment plant. The wastewater pan-genome is  
 136 larger than a clinical pan-genome one and of similar size to (see Table 1) highly diverse samples  
 137 comprising pathogenic, commensal, and lab *Escherichia coli*, as well as *Shigella*.  
 138

| Ref                                    | Pan   | Core | Strains | Path. | Comm. | Lab | Shig. |
|----------------------------------------|-------|------|---------|-------|-------|-----|-------|
| This study                             | 16582 | 2783 | 92      | 28    | 62    | 0   | 0     |
| Kaas et al., 2012 <sup>15</sup>        | 16373 | 1702 | 186     | 171   |       |     | 15    |
| Vieira et al., 2011 <sup>13</sup>      | 14986 | 1957 | 29      | 21    | 8     | 0   | 6     |
| Gordienko et al., 2013 <sup>12</sup>   | 12000 | 2000 | 32      | 16    | 6     | 3   | 7     |
| Lukjancenko et al., 2010 <sup>16</sup> | 13000 | 1472 | 53      | 35    | 11    | 7   | 0     |
| Rasko et al., 2008 <sup>17</sup>       | 13000 | 2344 | 17      | 14    | 1     | 2   | 0     |
| Touchon et al., 2009 <sup>14</sup>     | 11432 | 1976 | 20      | 10    | 3     | 0   | 7     |

139  
 140 Table 1: Highly diverse samples comprising pathogenic, commensal, and lab *Escherichia coli*, as  
 141 well as *Shigella*.

142  
 143



144

145

146 **Resistance genes in the wastewater pan-genome.** Wastewater *Escherichia coli* are known to  
147 host antibiotic resistance genes. While there are many known resistance genes (see e.g. CARD  
148 (12)), they fall mostly into a few groups, such as beta-lactamases. Here, we seek to confirm and  
149 expand the space for candidate resistance genes. Firstly, we measured antibiotic resistance in all  
150 1178 isolates to the 20 antibiotics. Fig. 4 reveals a high degree of resistance and huge  
151 differences between different antibiotics, including a general trend indicating greater resistance to  
152 antibiotics that have been available for longer. Concretely, antibiotics from the 50s and 60s have  
153 a significantly different number of resistances than the more recent antibiotics (Welch test, p-  
154 value < 0.0025). However, there is no significant difference in the number of resistances between  
155 isolates from the inflow and the outflow (p-value 0.0001), suggesting that wastewater treatment is  
156 not affecting resistance at all.

157

158

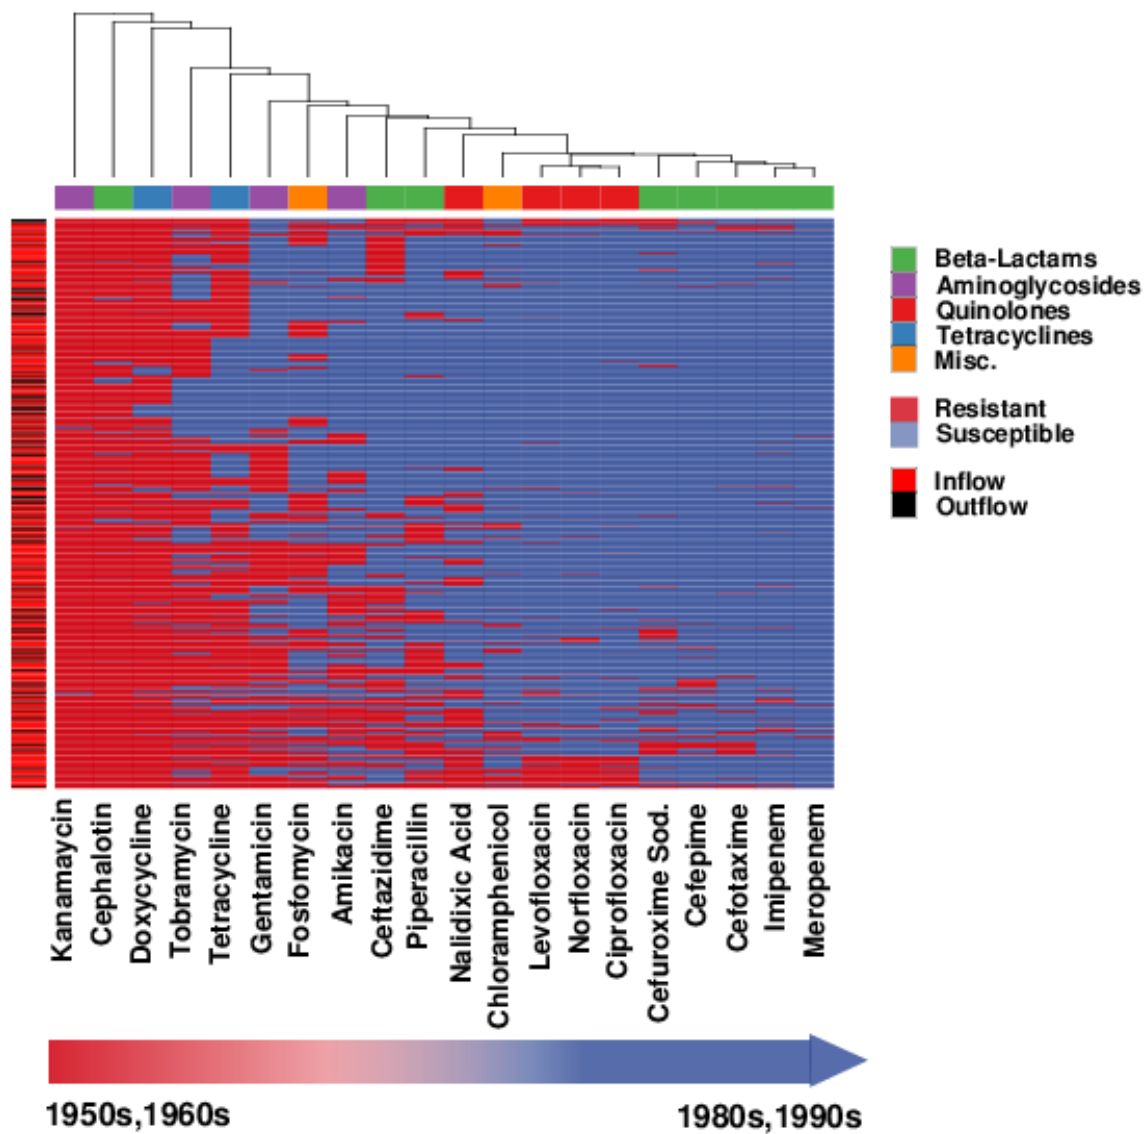

159

160 Figure 4: 1178 Wastewater *Escherichia coli* isolates are tested for antibiotic resistance to 20  
 161 antibiotics. Nearly all isolates are multi-drug resistant. Generally, isolates are more susceptible to  
 162 betalactams and fluoroquinolones than to tetracyclins and aminoglycosides. Surprisingly, the  
 163 outflow isolates show similar resistance as inflow (p-value 0.0001), suggesting that wastewater  
 164 treatment is not reducing resistance development.

165

166

167  
168 Next, we correlated the presence of each gene in the sequenced isolates with their phenotypic  
169 antibiotic resistance profiles. We excluded meropenem and imipenem, since nearly all isolates  
170 are susceptible. For each of the 18 remaining antibiotics, we list the top ten candidate resistance  
171 genes in Table 2. These 180 genes comprise 88 unique confirmed genes, including many well-  
172 known resistance genes, such as efflux pumps (MT1297 and *emrE*), membrane and transport  
173 proteins (*aida-I*, *yiaV*, *yijK*, *pitA*, *icsA*, and *pagN*), tetracycline (*tetA*, *tetR*, and *tetC*),  
174 chloramphenicol (*cat*), and piperacillin (the beta lactamase *bla2*) resistance genes. However, the  
175 180 genes also comprise a large number of open reading frames encoding hypothetical proteins  
176 (41) and genes not yet linked to antibiotic resistance (116). These genes have to be studied  
177 further to determine whether they are novel resistance genes or just correlating (e.g. because  
178 they are on the same genetic element with a resistance gene). All but three of the known and the  
179 potentially new resistance genes are present in some isolates obtained from the treatment plant's  
180 outflow.

181  
182



|    | Amikacin                                                      | Gentamicin                                      | Kanamycin                                       | Tobramycin                                                 | Doxycycline                                                             | Tetracycline                                                  | Cefepime                                                       | Cefotaxime                                      | Ceftazidime                                    | Cefuroxime Sod.                                       | Cephalotin                                           | Piperacillin                                            | Ciprofloxacin                                                      | Levofloxacin                                                            | Nalidixic Acid                                                         | Norfloxacin                                                             | Chloramphenicol                                        | Fosfomicin                                      |
|----|---------------------------------------------------------------|-------------------------------------------------|-------------------------------------------------|------------------------------------------------------------|-------------------------------------------------------------------------|---------------------------------------------------------------|----------------------------------------------------------------|-------------------------------------------------|------------------------------------------------|-------------------------------------------------------|------------------------------------------------------|---------------------------------------------------------|--------------------------------------------------------------------|-------------------------------------------------------------------------|------------------------------------------------------------------------|-------------------------------------------------------------------------|--------------------------------------------------------|-------------------------------------------------|
| 1  | Hypothetical Protein                                          | 4-hydroxyacetophenone monooxygenase <b>hapE</b> | Transposase IS200 like protein                  | Autotransporter precursor <b>aida-I</b>                    | Tetracycline resistance protein, class B <b>tetA</b>                    | Oxygen-dependent choline dehydrogenase <b>betA</b>            | Ash protein family protein                                     | Hypothetical Protein                            | cell division protein                          | Type-1 restriction enzyme R protein <b>hsdR</b>       | GTPase <b>era</b>                                    | Beta-lactamase TEM precursor <b>bla</b>                 | Virulence regulon transcriptional activator <b>virB</b>            | Transposon Tn10 protein <b>tetD</b>                                     | Mercuric resistance operon regulatory protein <b>merR</b>              | Transposon Tn10 protein <b>tetD</b>                                     | Chloramphenicol acetyltransferase <b>cat</b>           | Invasin <b>184</b>                              |
| 2  | Caudovirales tail fiber assembly protein                      | Phosphoadenosine phosphosulfate reductases      | putative multidrug-efflux transporter/M T1297   | putative protease <b>yhbU</b> precursor                    | Tetracycline repressor protein class B <b>tetR</b>                      | NAD/NADP-dependent betaine aldehyde dehydrogenase <b>betB</b> | Fibronectin type III protein                                   | Hypothetical Protein                            | Plasmid stability protein                      | Type I restriction enzyme EcoKI M protein <b>hsdM</b> | Prophage CP4-57 regulatory protein <b>alpA</b>       | Transposon Tn3 resolvase <b>tnpR</b>                    | Sporulation initiation inhibitor protein <b>Soj</b>                | Tetracycline resistance protein, class B <b>tetA_1</b>                  | Mercuric resistance protein <b>merC</b>                                | Tetracycline resistance protein, class B <b>tetA_1</b>                  | Streptomycin 3'-adenylyltransferase <b>ant1</b>        | Putative DNA-invertase <b>Rac pinR</b>          |
| 3  | Swarming motility protein <b>ybiA</b>                         | putative multidrug-efflux transporter/M T1297   | Phosphotransferase enzyme family protein        | Chaperone protein <b>dnaK</b>                              | Transposon Tn10 TetC protein <b>tetC</b>                                | HTH-type transcriptional regulator <b>betI</b>                | Transcriptional activator <b>perC</b>                          | Transcriptional activator <b>perC</b>           | HTH-type transcriptional regulator <b>cmtR</b> | <b>mrr</b> restriction system protein                 | Hypothetical Protein                                 | Tyrosine recombinase <b>xerD</b>                        | putative HTH-type transcriptional regulator                        | Tetracycline repressor protein class B from transposon Tn10 <b>tetR</b> | mercuric transport protein <b>merT</b>                                 | Tetracycline repressor protein class B from transposon Tn10 <b>tetR</b> | Chromosome-partitioning ATPase <b>soj</b>              | Transcriptional repressor <b>dicA</b>           |
| 4  | Phospholipase <b>ytpA</b>                                     | Phosphotransferase enzyme family protein        | Hypothetical Protein                            | putative ABC transporter ATP-binding protein <b>yjjK</b>   | HTH-type transcriptional regulator <b>cmtR</b>                          | Tetracycline resistance protein, class B <b>tetA</b>          | Hypothetical Protein                                           | Hypothetical Protein                            | Phage-related minor tail protein               | Outer membrane protein <b>lcsA</b> precursor          | Hypothetical Protein                                 | Acetyltransferase (GNAT) family protein                 | DNA-binding transcriptional regulator <b>dicC</b>                  | Transposon Tn10 protein <b>tetC</b>                                     | Mercuric transport protein periplasmic component precursor <b>merP</b> | Transposon Tn10 protein <b>tetC</b>                                     | <b>parG</b>                                            | Hypothetical Protein                            |
| 5  | Carbonic anhydrase 1 <b>cynT</b>                              | Hypothetical Protein                            | Streptomycin 3'-adenylyltransferase <b>ant1</b> | cell envelope integrity inner membrane protein <b>tolA</b> | Tetracycline resistance protein, class C <b>tetA</b>                    | Tetracycline repressor protein class B <b>tetR</b>            | Hypothetical Protein                                           | Hypothetical Protein                            | Phage tail protein E                           | Hypothetical Protein                                  | Hypothetical Protein                                 | Virulence regulon transcriptional activator <b>virB</b> | Hypothetical protein                                               | putative HTH-type transcriptional regulator                             | Anti-adaptor protein <b>iraM</b>                                       | CAAX amino terminal protease self-immunity                              | Hypothetical Protein                                   | Hypothetical Protein                            |
| 6  | Hypothetical Protein                                          | Hypothetical Protein                            | Hypothetical Protein                            | Inner membrane protein <b>yiaV</b> precursor               | putative inner membrane transporter <b>yedA</b>                         | Transposon Tn10 TetC protein <b>tetC</b>                      | Chromosome partition protein <b>smc</b>                        | Hypothetical Protein                            | Hypothetical Protein                           | Fibronectin type III protein                          | Transposon Tn10 <b>tetD</b> protein                  | Transposase                                             | Lysine-tRNA ligase <b>lysS</b>                                     | DNA-binding transcriptional regulator <b>dicC</b>                       | Hypothetical protein                                                   | mRNA interferase <b>pemK</b>                                            | Hypothetical Protein                                   | Hypothetical Protein                            |
| 7  | Xanthine dehydrogenase molybdenum-binding subunit <b>xdhA</b> | Hypothetical Protein                            | Zinc-responsive transcriptional regulator       | Entericidin B membrane lipoprotein                         | Tetracycline repressor protein class A from transposon 1721 <b>tetR</b> | High-affinity choline transport protein <b>betT</b>           | Hypothetical Protein                                           | Invasin                                         | Hypothetical Protein                           | Hypothetical Protein                                  | putative multidrug-efflux transporter/M T1297        | Tetracycline resistance protein, class B <b>tetA</b>    | Transposon Tn10 protein <b>tetD</b>                                | Hypothetical protein                                                    | Mercuric reductase <b>merA_1</b>                                       | Antitoxin <b>pemI</b>                                                   | Acetyltransferase (GNAT) family protein                | Molybdenum cofactor biosynthesis protein A      |
| 8  | Nicotinate dehydrogenase FAD-subunit <b>ndhF</b>              | Hypothetical Protein                            | <b>merE</b> protein                             | Low-affinity inorganic phosphate transporter 1 <b>pitA</b> | Hypothetical Protein                                                    | Formate dehydrogenase H <b>fdhF</b>                           | Aldehyde-alcohol dehydrogenase <b>adhE</b>                     | Hypothetical Protein                            | Tyrosine recombinase <b>xerC</b>               | Hypothetical Protein                                  | Phosphotransferase enzyme family protein             | Tetracycline repressor protein class B <b>tetR</b>      | Tetracycline resistance protein, class B <b>tetA_1</b>             | CAAX amino terminal protease self-immunity                              | Hypothetical protein                                                   | putative HTH-type transcriptional regulator                             | putative multidrug-efflux transporter/M T1297          | ATP-dependent zinc metalloprotease <b>ftsH4</b> |
| 9  | Nicotinate dehydrogenase small FeS subunit <b>ndhS</b>        | Phage polarity suppression protein <b>psu</b>   | Phosphoadenosine phosphosulfate reductases      | Methyl-accepting chemotaxis protein II <b>tar</b>          | Transposon Tn10 <b>tetD</b> protein                                     | S-fimbrial protein subunit <b>sfah</b>                        | Aldehyde-alcohol dehydrogenase <b>adhE</b>                     | Hypothetical Protein                            | Hypothetical Protein                           | Hypothetical Protein                                  | Outer membrane protein <b>pagN</b> precursor         | Transposon Tn10 <b>tetC</b> protein                     | Tetracycline repressor protein class B transposon Tn10 <b>tetR</b> | mRNA interferase <b>pemK</b>                                            | zinc-responsive transcriptional regulator                              | DNA-binding transcriptional regulator <b>dicC</b>                       | Phosphotransferase enzyme family protein               | Molybdenum cofactor biosynthesis protein A      |
| 10 | putative fimbrial-like protein EIfG precursor <b>elfG</b>     | DNA primase <b>traC</b>                         | Caudovirales tail fiber assembly protein        | Leucine-specific-binding protein precursor <b>livK</b>     | putative multidrug-efflux transporter/M T1297                           | Beta-lactamase TEM precursor <b>bla</b>                       | Cob(II)yrinic acid a,c-diamide adenosyltransferase <b>yvqK</b> | Type-1 restriction enzyme R protein <b>hsdR</b> | Hypothetical Protein                           | Hypothetical Protein                                  | Tetracycline resistance protein, class B <b>tetA</b> | Multidrug transporter <b>emrE</b>                       | Transposon Tn10 protein <b>TetC</b>                                | Antitoxin <b>PemI</b>                                                   | MerE protein                                                           | Caudovirales tail fiber assembly protein                                | Leucine-specific-binding protein precursor <b>livK</b> | Hypothetical Protein                            |

Table 2: Known and candidate resistance genes from correlation of genomes to resistance phenotype. Top 10 genes for 18 antibiotics.

185 **Discussion**

186 **The cost of resistance.** There is a debate on whether the evolution of resistance is a  
187 competitive disadvantage. Some evidence indicates that resistant bacteria may be outcompeted  
188 by susceptible bacteria (13) and that they may be collaterally sensitive (14), i.e. resistant bacteria  
189 may become susceptible through an appropriate co-treatment. In contrast, it appears that our  
190 isolates do not suffer from evolutionary disadvantages despite their resistance and the harsh  
191 environment of wastewater treatment. The latter includes the reduction of the bacterial population  
192 as indicated by a reduction in biochemical oxygen demand, which is part of secondary  
193 wastewater treatment. Despite this bacterial reduction, wastewater outflow has similar resistance  
194 levels as the inflow. These findings support evidence (15) that bacteria can compensate for the  
195 cost of resistance.

196 **Pathogenic potential and resistance.** Ultimate proof for pathogenicity can only be obtained  
197 from in vivo studies. However, the pathogenic potential can be assessed from an analysis of a  
198 genome for virulence markers. Here we chose to consider three independent approaches:  
199 classification by phylogenetic groups, by multi-locus sequence tags, and by identification of  
200 specific virulence factors (see methods). While the three approaches showed consistent results,  
201 they are by no means proof for pathogenicity, since there can be exceptions to these  
202 classification rules. As an example, consider the strain ed1a, which belongs to the phylogenetic  
203 group B2, but it is not pathogenic in mice (16). Similarly, pathogenicity may not only arise from the  
204 acquisition of genes, but also from the loss (17). Regarding resistance there are similar  
205 confounding factors. *Escherichia coli* is inherently resistant to kanamycin and cephalotin, which is  
206 also clearly shown in Fig. 4. More generally, antibiotic resistance is ancient (18) and naturally  
207 occurring in the environment. Nonetheless, there are pronounced differences between pristine  
208 and human environments (19). This is also supported by Fig. 4, which shows that antibiotics  
209 introduced in the 50s and 60s have more resistances than those introduced later (p-value <  
210 0.0025), which suggests, that the naturally occurring resistances do not play a major role in the  
211 emergence of observed resistances.

212

213 **From clinic to river.** We have shown that there are *Escherichia coli* at the wastewater outflow,  
214 which are multi-drug resistant and have pathogenic potential. But are they abundant enough to  
215 have an impact in the aquatic system they are released into? They do. The percentage of  
216 possibly pathogenic *Escherichia coli* in the outflow is considerable and may correspond to a large  
217 absolute amount. If an average of 100 *Escherichia coli* colony forming units (CFU) are released  
218 per ml, then  $10^{13}$  CFUs per day are released (assuming a release of  $10^5$  m<sup>3</sup> per day). This is in  
219 accordance with Manaia *et al.*, who showed that  $10^{10}$ - $10^{14}$  CFU of ciprofloxacin-resistant bacteria  
220 are released by a mid-sized wastewater treatment plant (20). Furthermore, a study in a Japanese  
221 river shows the presence of pathogenic *Escherichia coli*. Gomi *et al.* (21) sequenced over 500  
222 samples from the Yamato river and most of their prevalent multi-drug resistant and clinical strains  
223 are also present in our samples. In a related study, Czekalski *et al.* found that particle-associated  
224 wastewater bacteria are the responsible source for antibiotic resistance genes in the sediments of  
225 lake Geneva in Switzerland (22). Assuming that the river Elbe is comparable to these aquatic  
226 systems, it suggests, that clinic and river are connected with wastewater treatment plants in  
227 between.

228 **Composition of phylogroups.** It is interesting to compare the breakdown into phylogenetic  
229 groups of wastewater *Escherichia coli* to compare samples from human and animal  
230 environments. It is, e.g., known that the phylogenetic group B2 is more abundant among  
231 commensal *Escherichia coli* from human faeces (43%) than from farm animals (11%) (23).  
232 Therefore, the composition of wastewater *Escherichia coli* as shown in Fig. 2 resembles  
233 commensal *Escherichia coli* from farm animals more closely. Similarly, Tenailon find that groups  
234 A and B1 make up one third in human faeces (23), whereas we find two thirds. This suggests that  
235 animal waste plays an important role for resistance of waste water bacteria.

236 **Pan and core genome.** We identified known and candidate resistance genes by correlating their  
237 presence in the genome against their resistance phenotype across isolates. By virtue of this  
238 correlation, the identified genes are not to be found in the core genome, but in the pan genome.  
239 As many authors have pointed out, *Escherichia coli* has a large and flexible pan genome.  
240 Lapierre *et al.* argue that *Escherichia coli* appears to have unlimited ability to absorb genetic  
241 material and hence its pan genome is open (11). In a recent study comprising over 2000

242 genomes Land *et al.* put this into numbers and arrive at a pan genome of 60000-89000 gene  
243 families for over 2000 sequenced *E. coli* genomes (24). This upper limit shows that the  
244 wastewater pan genome of 16582 genes is still not the top. Nonetheless, it is considerably larger  
245 than a clinical pan genome. These differences indicate the heterogeneity of genomes. Clinical  
246 *Escherichia coli* genomes are not as diverse as the ones in a wastewater pool, which comprises  
247 besides human faeces also animal waste.

248 **Random sampling and hypothesis-free analysis.** The initial 1178 isolates were sampled  
249 randomly over different times of the year, from two different inflows and the outflow. In contrast,  
250 the 103 sequenced isolates were chosen in such way that all of the phenotypes encountered  
251 were represented (see methods). Within a phenotype group isolates were chosen randomly. This  
252 random, but representative choice and the subsequent link from genotype to phenotype is an  
253 example of high-throughput hypothesis-free analysis. And although, there was no pre-defined  
254 resistance mechanism, which we aimed to hit, many of the well-known resistance genes were  
255 ranked high. This supports the hope that high-throughput, hypothesis-free methods such as deep  
256 sequencing will help to uncover novel resistance mechanisms and in particular that some of the  
257 candidate resistance genes will prove to have a causal link to resistance.

258

## 259 **Conclusion**

260 Overall, we have shown for the first time that *Escherichia coli* isolates from a wastewater outflow  
261 have pathogenic potential and large pan-genomes, which harbor known and novel candidate  
262 resistance genes. Together with the estimates on absolute *Escherichia coli* abundance, this  
263 means that despite treatment, there is a considerable pathogenic potential at the outflow of a  
264 wastewater treatment plant. These results underline the need to include wastewater treatment  
265 plants in the combat against antibiotic resistance.

266



267

## 268 **Methods**

269 **Collection.** 1178 samples were collected from the municipal wastewater treatment plant  
270 Dresden, Germany. Samples were collected on 11/4/2012 (Spring 2012), 30/7/2012 (Summer  
271 2012), 21/1/2013 (Winter 2012), 27/3/2013 (Spring 2013), 6/8/2013 (Summer 2013), 14/10/2013  
272 (Autumn 2013), and 17/12/2013 (Winter 2013). Samples were collected either at the outflow  
273 (OUT) or at one of two inflow locations (Altstadt ALT and Neustadt NEU), representing the area  
274 south and north of the river Elbe).

275 **Isolation.** *Escherichia coli* and total coliforms bacteria were enumerated via serial fold dilution  
276 plating of the original wastewater (triplicate samples). Wastewaters were diluted in double distilled  
277 water, until the enumeration of bacterial colonies was possible. *Escherichia coli* and coliform  
278 counts were always performed in triplicates. The *Escherichia coli* colonies were selected and  
279 picked after overnight growth at 37°C on a selective chromogenic media (OXOID Brilliance  
280 *Escherichia coli*/Coliform Selective Agar, Basingstoke, England). To minimize the risk of colony  
281 contamination, picked colonies were spiked a second time on the same selective media and pure  
282 single colonies were grown overnight on LB media at 37°C and stored on glycerol stock at -80° C.

283 **Resistance phenotyping.** Antibiotic resistance phenotypes were determined by the agar  
284 diffusion method using 20 antibiotic discs (OXOID, England) according to EUCAST (or CLSI  
285 when EUCAST was not available) (13, 18). The selected drugs belong to the most commonly  
286 prescribed antibiotics for diseases caused by bacteria according to the German health insurance  
287 AOK Plus: piperacillin (100µg), nalidixic acid (30µg), chloramphenicol (30µg), imipenem (10µg),  
288 cefotaxime (30µg), cephalotin (30µg), kanamycin (30µg), tetracycline (30µg), gentamicin (10µg),  
289 amikacin (30µg), ciprofloxacin (5µg), fosfomycin (50µg), doxycycline (30µg), cefepime (30µg),  
290 ceftazidime (10µg), levofloxacin (5µg), meropenem (10µg), norfloxacin (10µg), cefuroxime sod.  
291 (30µg), tobramycin (10µg) (25). After 24 hours of incubation at 37°C, the resistance diameters  
292 were measured. Clustering of antibiotics and of isolates was performed using the R function  
293 heatmap.2 from the R library (26) Heatplus and hierarchical clustering of matrices based on  
294 Euclidean distances between isolates and between antibiotics.

295

296 **Sequencing.** To select isolates representative of phenotype, we clustered isolates according to  
297 the diameters of inhibition zone against the 20 antibiotics using k-means clustering based on  
298 Euclidean distances between isolates (vectors of 20 inhibition zone diameters). The analysis and  
299 graphs were produced using R version 3.2.4 (26). As clusters may be highly skewed in number of  
300 cluster members, we tested all cluster numbers from 1 to 100 and plotted within class sum of  
301 squares against  $k$ . At  $k = 47$ , the sum of squares tails off and there is a steep local decrease, so  
302 that  $k = 47$  was fixed as k-means parameter. We obtained 103 isolates, which were subsequently  
303 used for sequencing and further analysis. To further validate the choice, we plotted the average  
304 number of resistances against number of isolates and antibiotics vs. number of isolates for the  
305 total 1178 and the selected 103 isolates (see Supp Fig. 1) and concluded that both distributions  
306 are roughly similar. 3000ng DNA were extracted from each of the 103 selected isolates using  
307 MasterPure extraction kit (Epicentre) according to the manufacturer's instructions. Sequencing  
308 was performed using Illumina Flex GL.

309  
310 **Assembly.** Genomes were assembled with Abyss (version 1.5.2) (27). In order to optimize  $k$  for  
311 the best assembly, k-mer values had to be empirically selected from the range of 20-48 (see  
312 Supp. Fig. 2) on a per sample basis to maximize contiguity (3). To determine the k-mer length  
313 that achieved highest contiguity, the 28 assemblies per draft genome/isolate were compared  
314 based on  $N50$  values. 11 assemblies with an  $N50$  statistic of less than  $5 \times 10^4$  bp were excluded  
315 (28).

316

317

318 **Genes.** Reference gene clusters were computed from 58 complete *Escherichia coli* genomes  
319 (see Table 2) available in June 2015 from NCBI. Genes were identified in wastewater and  
320 reference genomes using Prokka (version 1.11) (29). Genes were clustered at 80% using CD-  
321 HIT (30) (version 4.6.3, arguments -n 4 -c 0.8 -G 1 -aL 0.8 -aS 0.8 -B 1). Genes with over 90%  
322 sequence identity, but only 30% coverage, as well as genes with 80% or greater identity and  
323 covered to phage and virus sequences (31) were discarded. A gene cluster is defined to be  
324 present in an isolate if there is a Prokka gene in the genome, which is longer than 100 amino  
325 acids and has over 80% sequence identity and coverage against the gene cluster representative.

326

327 **Pan- and core-genome.** To generate the pan- and core-genome size graph we followed the  
328 procedure in (3, 16). We had 92 genomes available. We varied  $i$  from one to 92. At each subset  
329 size  $i$ , we randomly selected  $i$  genomes and computed the sizes of the union (pan) and  
330 intersection (core) of gene clusters. This random selection was carried out 2000 times in each  
331 step.

332

333 **Gene clusters to rank genes by correlation to phenotype.** Prokka genes were identified in all  
334 isolate genomes and then clustered with CD-HIT at 60% sequence identity and 50% coverage  
335 (arguments -n 4 -c 0.6 -G 1 -aL 0.8 -aS 0.5 -B 1). A 80% identity cutoff was also tried but  
336 dismissed, because the 60% threshold yielded 25% less clusters while adequately clustering  
337 homologous gene sequences with lower sequence similarity. This threshold value is also  
338 supported by the widespread default use of the BLOSUM62 matrix, the basis of which is  
339 sequences clustered by 62% sequence identity.

340

341 **Tree.** The phylogenetic tree of 92 isolates was built following the procedure of (32, 33) using  
342 FastTree version 2.1 (34). Sequence reads were aligned to *Escherichia coli* K12 MG 1665 and  
343 single nucleotide variant calling was carried out using GATK (35). Quality control for variant  
344 calling was performed; variants supported by more than ten reads or likelihood score greater than  
345 200 were always in the range of 84 – 99% of variants called per isolate with the exception of 2

346 isolates where only 59% and 60% of the variants were above the threshold for quality and  
347 supporting reads. FastTree 2.1 (34) was then used to build the maximum likelihood tree based on  
348 the sequences derived from variant calling.

349 **Phylogrouping.** For phylogrouping, the classification system established by Clermont *et al.* (10)  
350 based on the genes *chuA* and *yjaA* and the DNA fragment TspE4.C2 was used. Blast was  
351 performed to check each genome assembly for presence or absence of the aforementioned  
352 elements with an identity cutoff  $\geq 90\%$ .

353  
354 **MLST.** Concerning epidemiology and Multi-Locus Sequence Typing, we used the webserver at  
355 <https://cge.cbs.dtu.dk/services/MLST/> that follows the MLST scheme in (36) for predicting MLSTs  
356 from whole genome sequence data (37). 92 Draft genome assemblies were submitted and  
357 results were obtained; 5 isolates were unidentified demonstrating novel sequence types.

358  
359 **Virulence factors.** Virulence factors protein sequences were downloaded from VFDB: Virulence  
360 Factors database (8, 38). 2000 sequences which were *Escherichia coli* related were chosen.  
361 Sequences were then clustered at 80% sequence identity using CD-HIT (version 4.6.3,  
362 arguments -n 4 -c 0.8 -G 1 -aL 0.8 -aS 0.8 -B 1). A virulence factor was considered present in an  
363 isolate's genome if there is a Prokka gene in the genome that has over 80% sequence identity  
364 and coverage against the virulence factor cluster representative.

365

366

367 **ExPEC classification.** There are intra- and extra-intestinal pathogenic *E.coli*, which can be  
 368 classified from the presence of virulence factors (39-42). InPEC are characterised by the  
 369 virulence factors stx1, stx2, escV, and bfpB. They are ExPEC if they contain over 20 of 58  
 370 virulence factors afa/draBC, bmaE, gafD, iha cds, mat, papEF, papGII, III, sfa/foc, etsB, etsC, sitD  
 371 ep, sitD ch, cvaC MPIII, colV MPIX, eitA, eitC, iss, neuC, kpsMTII, ompA, ompT, traT, hlyF, GimB,  
 372 malX, puvA, yqi, stx1, stx2, escV, bfp, feob, aatA, csgA, fimC, focG, nfaE, papAH, papC, sfaS,  
 373 tsh, chuA, fyuA, ireA, iroN, irp2, iucD, iutA, sitA, astA, cnf1, sat, vat, hlyA, hlyC, ibeA, tia, and pic.

374

375 **Data availability statement**

376 Genome assemblies of the analyzed isolates that support the findings of the study will be made  
 377 available on the NCBI upon paper publication (see Table 3).

378 **Accession numbers of novel whole genome assemblies of analyzed isolates.**

| Bioproject  | Biosample    | Accession    | strain                               |
|-------------|--------------|--------------|--------------------------------------|
| PRJNA380388 | SAMN06641941 | NBBP00000000 | Escherichia coli Win2013_WWKa_OUT_3  |
| PRJNA380388 | SAMN06641940 | NBBQ00000000 | Escherichia coli Win2013_WWKa_OUT_29 |
| PRJNA380388 | SAMN06641933 | NBBR00000000 | Escherichia coli Win2013_WWKa_OUT_18 |
| PRJNA380388 | SAMN06641932 | NBBS00000000 | Escherichia coli Win2013_WWKa_OUT_24 |
| PRJNA380388 | SAMN06641931 | NBBT00000000 | Escherichia coli Win2013_WWKa_OUT_1  |
| PRJNA380388 | SAMN06641928 | NBBU00000000 | Escherichia coli Win2013_WWKa_NEU_65 |
| PRJNA380388 | SAMN06641927 | NBBV00000000 | Escherichia coli Win2013_WWKa_NEU_20 |
| PRJNA380388 | SAMN06641926 | NBBW00000000 | Escherichia coli Win2013_WWKa_NEU_60 |
| PRJNA380388 | SAMN06641901 | NBBX00000000 | Escherichia coli Win2013_WWKa_ALT_23 |
| PRJNA380388 | SAMN06641884 | NBBY00000000 | Escherichia coli Win2012_WWKa_OUT_49 |
| PRJNA380388 | SAMN06641883 | NBBZ00000000 | Escherichia coli Win2012_WWKa_OUT_8  |
| PRJNA380388 | SAMN06641882 | NBCA00000000 | Escherichia coli Win2012_WWKa_OUT_34 |
| PRJNA380388 | SAMN06641881 | NBCB00000000 | Escherichia coli Win2012_WWKa_OUT_35 |
| PRJNA380388 | SAMN06641880 | NBCC00000000 | Escherichia coli Win2012_WWKa_OUT_29 |
| PRJNA380388 | SAMN06641879 | NBCD00000000 | Escherichia coli Win2012_WWKa_OUT_26 |
| PRJNA380388 | SAMN06641878 | NBCE00000000 | Escherichia coli Win2012_WWKa_OUT_33 |
| PRJNA380388 | SAMN06641877 | NBCF00000000 | Escherichia coli Win2012_WWKa_OUT_21 |
| PRJNA380388 | SAMN06641876 | NBCG00000000 | Escherichia coli Win2012_WWKa_OUT_2  |
| PRJNA380388 | SAMN06641875 | NBCH00000000 | Escherichia coli Win2012_WWKa_NEU_7  |
| PRJNA380388 | SAMN06641874 | NBCI00000000 | Escherichia coli Win2012_WWKa_OUT_14 |
| PRJNA380388 | SAMN06641873 | NBCJ00000000 | Escherichia coli Win2012_WWKa_NEU_51 |
| PRJNA380388 | SAMN06641872 | NBCK00000000 | Escherichia coli Win2012_WWKa_NEU_31 |
| PRJNA380388 | SAMN06641871 | NBCQ00000000 | Escherichia coli Win2012_WWKa_NEU_37 |
| PRJNA380388 | SAMN06641870 | NBCR00000000 | Escherichia coli Win2012_WWKa_NEU_16 |
| PRJNA380388 | SAMN06641869 | NBCS00000000 | Escherichia coli Win2012_WWKa_NEU_19 |
| PRJNA380388 | SAMN06641868 | NBCT00000000 | Escherichia coli Win2012_WWKa_NEU_12 |
| PRJNA380388 | SAMN06641867 | NBCU00000000 | Escherichia coli Win2012_WWKa_ALT_65 |
| PRJNA380388 | SAMN06641866 | NBCV00000000 | Escherichia coli Win2012_WWKa_NEU_1  |
| PRJNA380388 | SAMN06641865 | NBCW00000000 | Escherichia coli Win2012_WWKa_ALT_49 |
| PRJNA380388 | SAMN06641864 | NBCX00000000 | Escherichia coli Win2012_WWKa_ALT_54 |
| PRJNA380388 | SAMN06641863 | NBCY00000000 | Escherichia coli Sum2013_WWKa_OUT_5  |
| PRJNA380388 | SAMN06641862 | NBCZ00000000 | Escherichia coli Sum2013_WWKa_OUT_39 |
| PRJNA380388 | SAMN06641861 | NBDA00000000 | Escherichia coli Sum2013_WWKa_OUT_49 |
| PRJNA380388 | SAMN06641860 | NBDB00000000 | Escherichia coli Sum2013_WWKa_OUT_3  |
| PRJNA380388 | SAMN06641859 | NBDC00000000 | Escherichia coli Sum2013_WWKa_OUT_31 |
| PRJNA380388 | SAMN06641858 | NBDD00000000 | Escherichia coli Sum2013_WWKa_OUT_2  |
| PRJNA380388 | SAMN06641857 | NBDE00000000 | Escherichia coli Sum2013_WWKa_OUT_21 |
| PRJNA380388 | SAMN06641856 | NBDF00000000 | Escherichia coli Sum2013_WWKa_NEU_53 |
| PRJNA380388 | SAMN06641855 | NBDG00000000 | Escherichia coli Sum2013_WWKa_NEU_46 |
| PRJNA380388 | SAMN06641854 | NBDH00000000 | Escherichia coli Sum2013_WWKa_NEU_39 |
| PRJNA380388 | SAMN06641853 | NBDI00000000 | Escherichia coli Sum2013_WWKa_ALT_44 |
| PRJNA380388 | SAMN06641852 | NBDJ00000000 | Escherichia coli Sum2013_WWKa_NEU_29 |
| PRJNA380388 | SAMN06641851 | NBDK00000000 | Escherichia coli Spr2013_WWKa_OUT_27 |

|             |              |              |                                      |
|-------------|--------------|--------------|--------------------------------------|
| PRJNA380388 | SAMN06641844 | NBDL00000000 | Escherichia coli Sum2013_WWKa_ALT_41 |
| PRJNA380388 | SAMN06641843 | NBDM00000000 | Escherichia coli Sum2013_WWKa_ALT_27 |
| PRJNA380388 | SAMN06641842 | NBDN00000000 | Escherichia coli Spr2013_WWKa_OUT_56 |
| PRJNA380388 | SAMN06641841 | NBDO00000000 | Escherichia coli Sum2013_WWKa_ALT_20 |
| PRJNA380388 | SAMN06641840 | NBJM00000000 | Escherichia coli Spr2013_WWKa_OUT_5  |
| PRJNA380388 | SAMN06641839 | NBJN00000000 | Escherichia coli Spr2013_WWKa_OUT_55 |
| PRJNA380388 | SAMN06641838 | NBJO00000000 | Escherichia coli Spr2013_WWKa_OUT_32 |
| PRJNA380388 | SAMN06641837 | NBJP00000000 | Escherichia coli Spr2013_WWKa_OUT_45 |
| PRJNA380388 | SAMN06641822 | NBJQ00000000 | Escherichia coli Spr2013_WWKa_OUT_15 |
| PRJNA380388 | SAMN06641821 | NBJR00000000 | Escherichia coli Spr2013_WWKa_OUT_29 |
| PRJNA380388 | SAMN06641820 | NBJS00000000 | Escherichia coli Spr2013_WWKa_NEU_6  |
| PRJNA380388 | SAMN06641819 | NBJT00000000 | Escherichia coli Spr2013_WWKa_OUT_11 |
| PRJNA380388 | SAMN06641818 | NBJU00000000 | Escherichia coli Spr2013_WWKa_NEU_15 |
| PRJNA380388 | SAMN06641817 | NBJV00000000 | Escherichia coli Spr2013_WWKa_NEU_37 |
| PRJNA380388 | SAMN06641816 | NBJW00000000 | Escherichia coli Spr2013_WWKa_ALT_63 |
| PRJNA380388 | SAMN06641815 | NBJX00000000 | Escherichia coli Spr2013_WWKa_ALT_71 |
| PRJNA380388 | SAMN06641814 | NBJY00000000 | Escherichia coli Spr2013_WWKa_ALT_51 |
| PRJNA380388 | SAMN06641813 | NBJZ00000000 | Escherichia coli Spr2013_WWKa_ALT_55 |
| PRJNA380388 | SAMN06641812 | NBKA00000000 | Escherichia coli Spr2013_WWKa_ALT_43 |
| PRJNA380388 | SAMN06641811 | NBKB00000000 | Escherichia coli Spr2013_WWKa_ALT_27 |
| PRJNA380388 | SAMN06641810 | NBKC00000000 | Escherichia coli Spr2013_WWKa_ALT_41 |
| PRJNA380388 | SAMN06641809 | NBKD00000000 | Escherichia coli Spr2012_WWKa_OUT_37 |
| PRJNA380388 | SAMN06641808 | NBKE00000000 | Escherichia coli Spr2012_WWKa_OUT_54 |
| PRJNA380388 | SAMN06641807 | NBKF00000000 | Escherichia coli Spr2012_WWKa_OUT_25 |
| PRJNA380388 | SAMN06641806 | NBKG00000000 | Escherichia coli Spr2012_WWKa_OUT_3  |
| PRJNA380388 | SAMN06641805 | NBKH00000000 | Escherichia coli Spr2012_WWKa_OUT_16 |
| PRJNA380388 | SAMN06641804 | NBKI00000000 | Escherichia coli Spr2012_WWKa_OUT_13 |
| PRJNA380388 | SAMN06641803 | NBKJ00000000 | Escherichia coli Spr2012_WWKa_NEU_74 |
| PRJNA380388 | SAMN06641802 | NBKK00000000 | Escherichia coli Spr2012_WWKa_OUT_12 |
| PRJNA380388 | SAMN06641801 | NBKL00000000 | Escherichia coli Spr2012_WWKa_NEU_31 |
| PRJNA380388 | SAMN06641800 | NBKM00000000 | Escherichia coli Spr2012_WWKa_NEU_51 |
| PRJNA380388 | SAMN06641799 | NBKN00000000 | Escherichia coli Spr2012_WWKa_NEU_24 |
| PRJNA380388 | SAMN06641798 | NBKO00000000 | Escherichia coli Spr2012_WWKa_ALT_27 |
| PRJNA380388 | SAMN06641797 | NBKP00000000 | Escherichia coli Spr2012_WWKa_ALT_35 |
| PRJNA380388 | SAMN06641796 | NBKQ00000000 | Escherichia coli Aut2013_WWKa_OUT_3  |
| PRJNA380388 | SAMN06641793 | NBKR00000000 | Escherichia coli Aut2013_WWKa_OUT_10 |
| PRJNA380388 | SAMN06641792 | NBKS00000000 | Escherichia coli Aut2013_WWKa_OUT_20 |
| PRJNA380388 | SAMN06641791 | NBKT00000000 | Escherichia coli Aut2013_WWKa_NEU_51 |
| PRJNA380388 | SAMN06641789 | NBKU00000000 | Escherichia coli Aut2013_WWKa_NEU_53 |
| PRJNA380388 | SAMN06641788 | NBKV00000000 | Escherichia coli Aut2013_WWKa_NEU_44 |
| PRJNA380388 | SAMN06641786 | NBKW00000000 | Escherichia coli Aut2013_WWKa_ALT_65 |
| PRJNA380388 | SAMN06641785 | NBKX00000000 | Escherichia coli Aut2013_WWKa_NEU_28 |
| PRJNA380388 | SAMN06641784 | NBKY00000000 | Escherichia coli Aut2013_WWKa_ALT_59 |
| PRJNA380388 | SAMN06641782 | NBKZ00000000 | Escherichia coli Aut2013_WWKa_ALT_48 |
| PRJNA380388 | SAMN06641780 | NBLA00000000 | Escherichia coli Aut2013_WWKa_ALT_45 |
| PRJNA380388 | SAMN06641779 | NBLB00000000 | Escherichia coli Aut2013_WWKa_ALT_30 |
| PRJNA380388 | SAMN06641778 | NBLC00000000 | Escherichia coli Aut2013_WWKa_ALT_17 |
| PRJNA380388 | SAMN06641777 | NBLD00000000 | Escherichia coli Aut2013_WWKa_ALT_13 |
| PRJNA380388 | SAMN06670745 | NBNO00000000 | Escherichia coli Win2012_WWKa_OUT_19 |

379

380 Table 3: Accession numbers of 92 de novo assembled *E. coli* genomes.

381

382

383

384

385

386  
387

## References

- 388 1. **Hu Y, Yang X, Qin J, Lu N, Cheng G, Wu N, Pan Y, Li J, Zhu L, Wang X, Meng Z, Zhao F, Liu D,**  
389 **Ma J, Qin N, Xiang C, Xiao Y, Li L, Yang H, Wang J, Yang R, Gao GF, Zhu B.** 2013.  
390 Metagenome-wide analysis of antibiotic resistance genes in a large cohort of human gut  
391 microbiota. *Nat Commun* **4**:2151.
- 392 2. **Sommer MO, Dantas G, Church GM.** 2009. Functional characterization of the antibiotic  
393 resistance reservoir in the human microflora. *Science* **325**:1128-1131.
- 394 3. **Salipante SJ, Roach DJ, Kitzman JO, Snyder MW, Stackhouse B, Butler-Wu SM, Lee C,**  
395 **Cookson BT, Shendure J.** 2015. Large-scale genomic sequencing of extraintestinal pathogenic  
396 *Escherichia coli* strains. *Genome Res* **25**:119-128.
- 397 4. **Forsberg KJ, Reyes A, Wang B, Selleck EM, Sommer MO, Dantas G.** 2012. The shared  
398 antibiotic resistome of soil bacteria and human pathogens. *Science* **337**:1107-1111.
- 399 5. **Riesenfeld CS, Goodman RM, Handelsman J.** 2004. Uncultured soil bacteria are a reservoir  
400 of new antibiotic resistance genes. *Environ Microbiol* **6**:981-989.
- 401 6. **Rizzo L, Manaia C, Merlin C, Schwartz T, Dagot C, Ploy MC, Michael I, Fatta-Kassinos D.**  
402 2013. Urban wastewater treatment plants as hotspots for antibiotic resistant bacteria and  
403 genes spread into the environment: a review. *Sci Total Environ* **447**:345-360.
- 404 7. **Schaufler K, Semmler T, Pickard DJ, de Toro M, de la Cruz F, Wieler LH, Ewers C,**  
405 **Guenther S.** 2016. Carriage of Extended-Spectrum Beta-Lactamase-Plasmids Does Not Reduce  
406 Fitness but Enhances Virulence in Some Strains of Pandemic *E. coli* Lineages. *Front Microbiol*  
407 **7**:336.
- 408 8. **Yang J, Chen L, Sun L, Yu J, Jin Q.** 2008. VFDB 2008 release: an enhanced web-based resource  
409 for comparative pathogenomics. *Nucleic Acids Res* **36**:D539-542.
- 410 9. **Jaureguy F, Landraud L, Passet V, Diancourt L, Frapy E, Guigon G, Carbonnelle E,**  
411 **Lortholary O, Clermont O, Denamur E, Picard B, Nassif X, Brisse S.** 2008. Phylogenetic and  
412 genomic diversity of human bacteremic *Escherichia coli* strains. *BMC Genomics* **9**:560.
- 413 10. **Clermont O, Bonacorsi S, Bingen E.** 2000. Rapid and simple determination of the *Escherichia*  
414 *coli* phylogenetic group. *Appl Environ Microbiol* **66**:4555-4558.
- 415 11. **Lapierre P, Gogarten JP.** 2009. Estimating the size of the bacterial pan-genome. *Trends Genet*  
416 **25**:107-110.
- 417 12. **McArthur AG, Waglechner N, Nizam F, Yan A, Azad MA, Baylay AJ, Bhullar K, Canova MJ,**  
418 **De Pascale G, Ejim L, Kalan L, King AM, Koteva K, Morar M, Mulvey MR, O'Brien JS,**  
419 **Pawlowski AC, Piddock LJ, Spanogiannopoulos P, Sutherland AD, Tang I, Taylor PL,**  
420 **Thaker M, Wang W, Yan M, Yu T, Wright GD.** 2013. The comprehensive antibiotic resistance  
421 database. *Antimicrob Agents Chemother* **57**:3348-3357.
- 422 13. **Andersson DI, Hughes D.** 2010. Antibiotic resistance and its cost: is it possible to reverse  
423 resistance? *Nat Rev Microbiol* **8**:260-271.
- 424 14. **Pal C, Papp B, Lazar V.** 2015. Collateral sensitivity of antibiotic-resistant microbes. *Trends*  
425 *Microbiol* **23**:401-407.
- 426 15. **Schrag SJ, Perrot V, Levin BR.** 1997. Adaptation to the fitness costs of antibiotic resistance in  
427 *Escherichia coli*. *Proc Biol Sci* **264**:1287-1291.
- 428 16. **Touchon M, Hoede C, Tenaillon O, Barbe V, Baeriswyl S, Bidet P, Bingen E, Bonacorsi S,**  
429 **Bouchier C, Bouvet O, Calteau A, Chiapello H, Clermont O, Cruveiller S, Danchin A, Diard**  
430 **M, Dossat C, Karoui ME, Frapy E, Garry L, Ghigo JM, Gilles AM, Johnson J, Le Bouguenec C,**  
431 **Lescat M, Mangenot S, Martinez-Jehanne V, Matic I, Nassif X, Oztas S, Petit MA, Pichon C,**  
432 **Rouy Z, Ruf CS, Schneider D, Turret J, Vacherie B, Vallenet D, Medigue C, Rocha EP,**  
433 **Denamur E.** 2009. Organised genome dynamics in the *Escherichia coli* species results in  
434 highly diverse adaptive paths. *PLoS Genet* **5**:e1000344.
- 435 17. **Maurelli AT, Fernandez RE, Bloch CA, Rode CK, Fasano A.** 1998. "Black holes" and bacterial  
436 pathogenicity: a large genomic deletion that enhances the virulence of *Shigella* spp. and  
437 enteroinvasive *Escherichia coli*. *Proc Natl Acad Sci U S A* **95**:3943-3948.
- 438 18. **D'Costa VM, King CE, Kalan L, Morar M, Sung WW, Schwarz C, Froese D, Zazula G, Calmels**  
439 **F, Debruyne R, Golding GB, Poinar HN, Wright GD.** 2011. Antibiotic resistance is ancient.  
440 *Nature* **477**:457-461.

- 441 19. **Durso LM, Miller DN, Wienhold BJ.** 2012. Distribution and quantification of antibiotic  
442 resistant genes and bacteria across agricultural and non-agricultural metagenomes. *PLoS One*  
443 **7**:e48325.
- 444 20. **Manaia CM, Novo A, Coelho B, Nunes OC.** 2010. Ciprofloxacin Resistance in Domestic  
445 Wastewater Treatment Plants. *Water Air and Soil Pollution* **208**:335-343.
- 446 21. **Gomi R, Matsuda T, Matsumura Y, Yamamoto M, Tanaka M, Ichiyama S, Yoneda M.** 2017.  
447 Whole-Genome Analysis of Antimicrobial-Resistant and Extraintestinal Pathogenic  
448 *Escherichia coli* in River Water. *Appl Environ Microbiol* **83**.
- 449 22. **Czekalski N, Berthold T, Caucci S, Egli A, Burgmann H.** 2012. Increased levels of  
450 multiresistant bacteria and resistance genes after wastewater treatment and their  
451 dissemination into lake Geneva, Switzerland. *Front Microbiol* **3**:106.
- 452 23. **Tenaillon O, Skurnik D, Picard B, Denamur E.** 2010. The population genetics of commensal  
453 *Escherichia coli*. *Nat Rev Microbiol* **8**:207-217.
- 454 24. **Land M, Hauser L, Jun SR, Nookaew I, Leuze MR, Ahn TH, Karpinets T, Lund O, Kora G,  
455 Wassenaar T, Poudel S, Ussery DW.** 2015. Insights from 20 years of bacterial genome  
456 sequencing. *Funct Integr Genomics* **15**:141-161.
- 457 25. **Caucci S, Karkman A, Cacace D, Rybicki M, Timpel P, Voolaid V, Gurke R, Virta M,  
458 Berendonk TU.** 2016. Seasonality of antibiotic prescriptions for outpatients and resistance  
459 genes in sewers and wastewater treatment plant outflow. *FEMS Microbiol Ecol* **92**:fiw060.
- 460 26. **R Development Core Team.** 2010. R: A language and environment for statistical computing,  
461 R Foundation for Statistical Computing, Vienna, Austria. <http://www.R-project.org>.
- 462 27. **Simpson JT, Wong K, Jackman SD, Schein JE, Jones SJ, Birol I.** 2009. ABySS: a parallel  
463 assembler for short read sequence data. *Genome Res* **19**:1117-1123.
- 464 28. **Hashimoto M, Ichimura T, Mizoguchi H, Tanaka K, Fujimitsu K, Keyamura K, Ote T,  
465 Yamakawa T, Yamazaki Y, Mori H, Katayama T, Kato J.** 2005. Cell size and nucleoid  
466 organization of engineered *Escherichia coli* cells with a reduced genome. *Mol Microbiol*  
467 **55**:137-149.
- 468 29. **Seemann T.** 2014. Prokka: rapid prokaryotic genome annotation. *Bioinformatics* **30**:2068-  
469 2069.
- 470 30. **Li W, Godzik A.** 2006. Cd-hit: a fast program for clustering and comparing large sets of  
471 protein or nucleotide sequences. *Bioinformatics* **22**:1658-1659.
- 472 31. **Zhou Y, Liang Y, Lynch KH, Dennis JJ, Wishart DS.** 2011. PHAST: a fast phage search tool.  
473 *Nucleic Acids Res* **39**:W347-352.
- 474 32. **Delsuc F, Brinkmann H, Philippe H.** 2005. Phylogenomics and the reconstruction of the tree  
475 of life. *Nat Rev Genet* **6**:361-375.
- 476 33. **Kumar S, Filipski AJ, Battistuzzi FU, Kosakovsky Pond SL, Tamura K.** 2012. Statistics and  
477 truth in phylogenomics. *Mol Biol Evol* **29**:457-472.
- 478 34. **Price MN, Dehal PS, Arkin AP.** 2010. FastTree 2--approximately maximum-likelihood trees  
479 for large alignments. *PLoS One* **5**:e9490.
- 480 35. **McKenna A, Hanna M, Banks E, Sivachenko A, Cibulskis K, Kernytsky A, Garimella K,  
481 Altshuler D, Gabriel S, Daly M, DePristo MA.** 2010. The Genome Analysis Toolkit: a  
482 MapReduce framework for analyzing next-generation DNA sequencing data. *Genome Res*  
483 **20**:1297-1303.
- 484 36. **Wirth T, Falush D, Lan R, Colles F, Mensa P, Wieler LH, Karch H, Reeves PR, Maiden MC,  
485 Ochman H, Achtman M.** 2006. Sex and virulence in *Escherichia coli*: an evolutionary  
486 perspective. *Mol Microbiol* **60**:1136-1151.
- 487 37. **Larsen MV, Cosentino S, Rasmussen S, Friis C, Hasman H, Marvig RL, Jelsbak L, Sicheritz-  
488 Ponten T, Ussery DW, Aarestrup FM, Lund O.** 2012. Multilocus sequence typing of total-  
489 genome-sequenced bacteria. *J Clin Microbiol* **50**:1355-1361.
- 490 38. **Chen L, Yang J, Yu J, Yao Z, Sun L, Shen Y, Jin Q.** 2005. VFDB: a reference database for  
491 bacterial virulence factors. *Nucleic Acids Res* **33**:D325-328.
- 492 39. **Antikainen J, Tarkka E, Haukka K, Siitonen A, Vaara M, Kirveskari J.** 2009. New 16-plex  
493 PCR method for rapid detection of diarrheagenic *Escherichia coli* directly from stool samples.  
494 *Eur J Clin Microbiol Infect Dis* **28**:899-908.
- 495 40. **Johnson JR, Russo TA.** 2005. Molecular epidemiology of extraintestinal pathogenic  
496 (uropathogenic) *Escherichia coli*. *Int J Med Microbiol* **295**:383-404.



- 497 41. **Johnson JR, Stell AL.** 2000. Extended virulence genotypes of *Escherichia coli* strains from  
498 patients with urosepsis in relation to phylogeny and host compromise. *J Infect Dis* **181**:261-  
499 272.
- 500 42. **Pitout JD.** 2012. Extraintestinal Pathogenic *Escherichia coli*: A Combination of Virulence with  
501 Antibiotic Resistance. *Front Microbiol* **3**:9.  
502
- 503
